# Supplementary material for: Chromatin Remodeling Enzyme Snf2h Is Essential for Retinal Cell Proliferation and Photoreceptor Maintenance
Source: MDPI journal article supplement (doi:10.3390/cells12071035), 2023-03-28
Supplement: s1 [file s1]

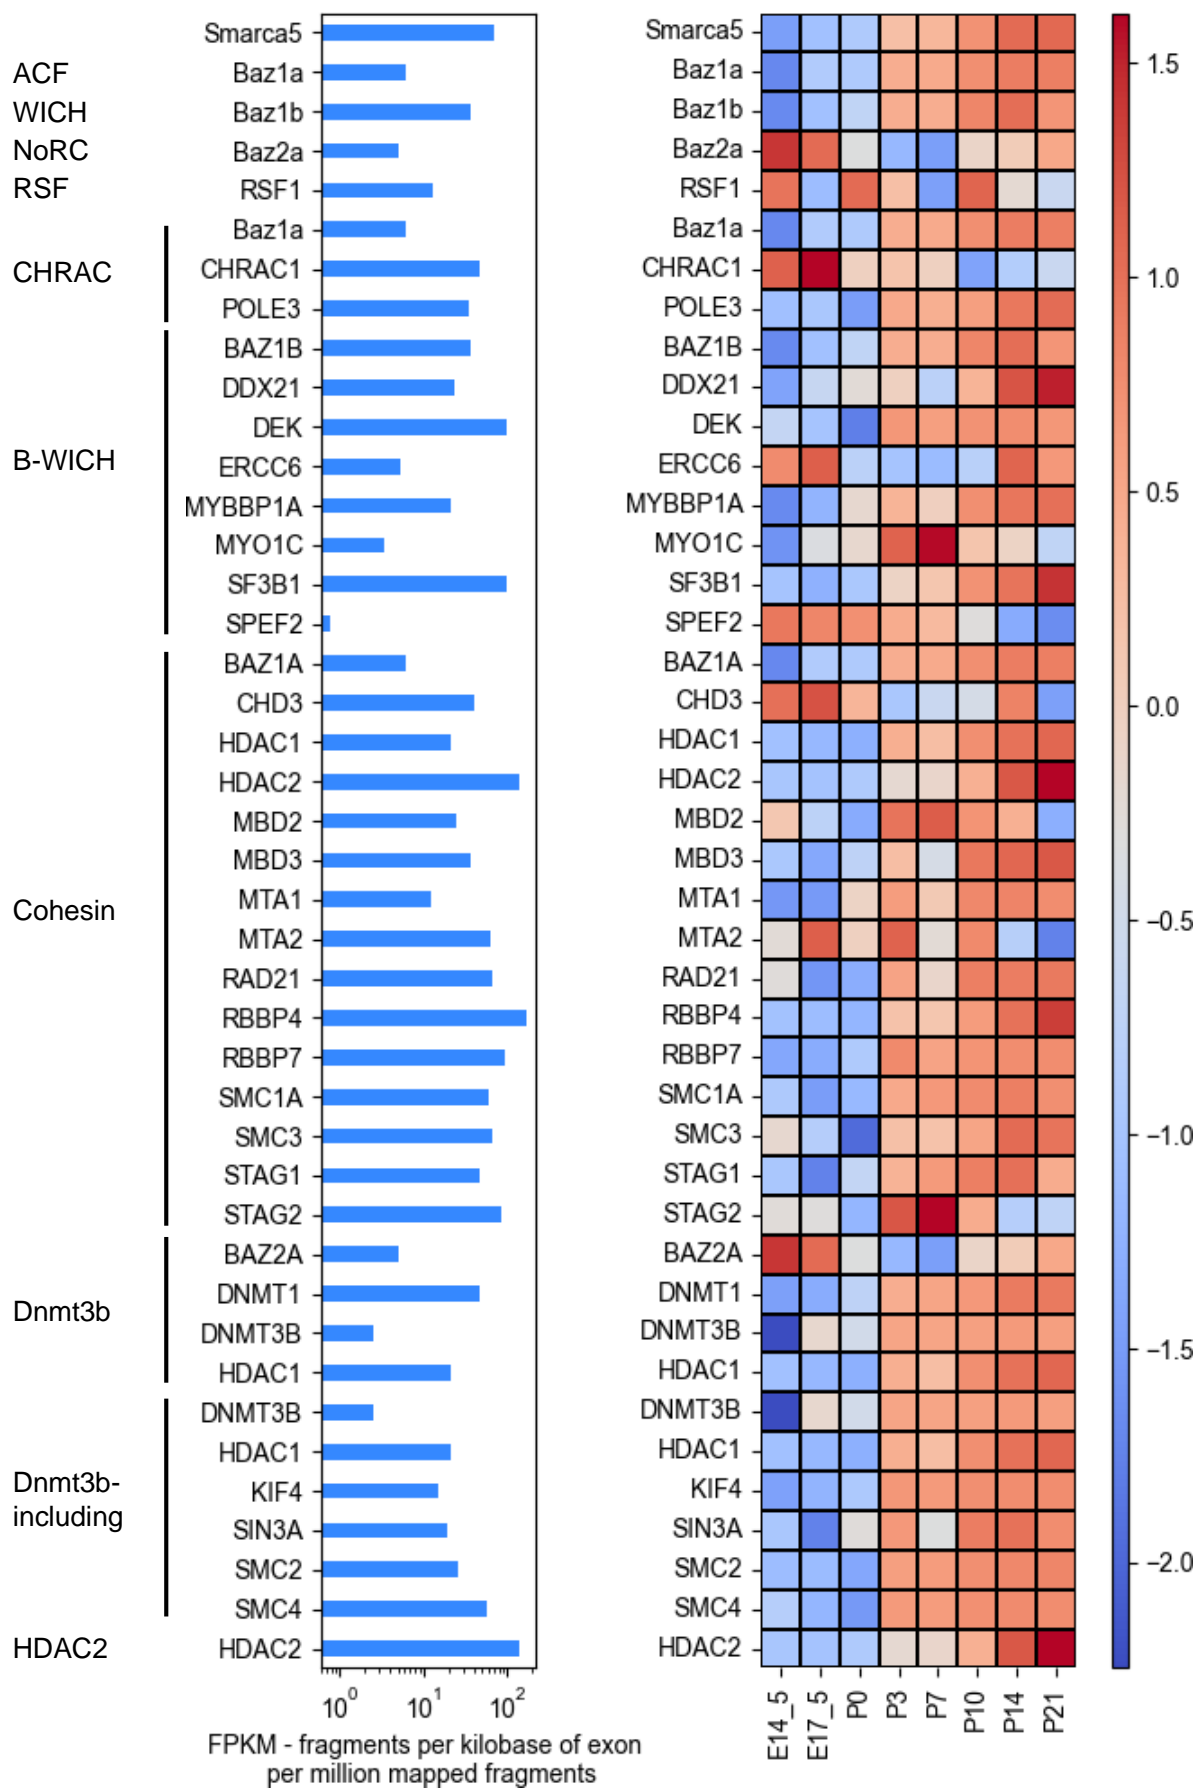

**Supplementary Figure S1. Expression of Snf2h and its interacting partners during retinal development.**

Heatmap showing expression of components of ACF, WICH, NoRC, RSF, CHRAC, B-WICH, Cohesin, Dnmt3b, Dnmt3b-including, and HDAC2 complexes in retina at E14.5, E17.5, P0, P3, P7, P10, P14, and P21 (GSE87064 (Aldiri et al., 2017)). The left graph indicates FPKM.

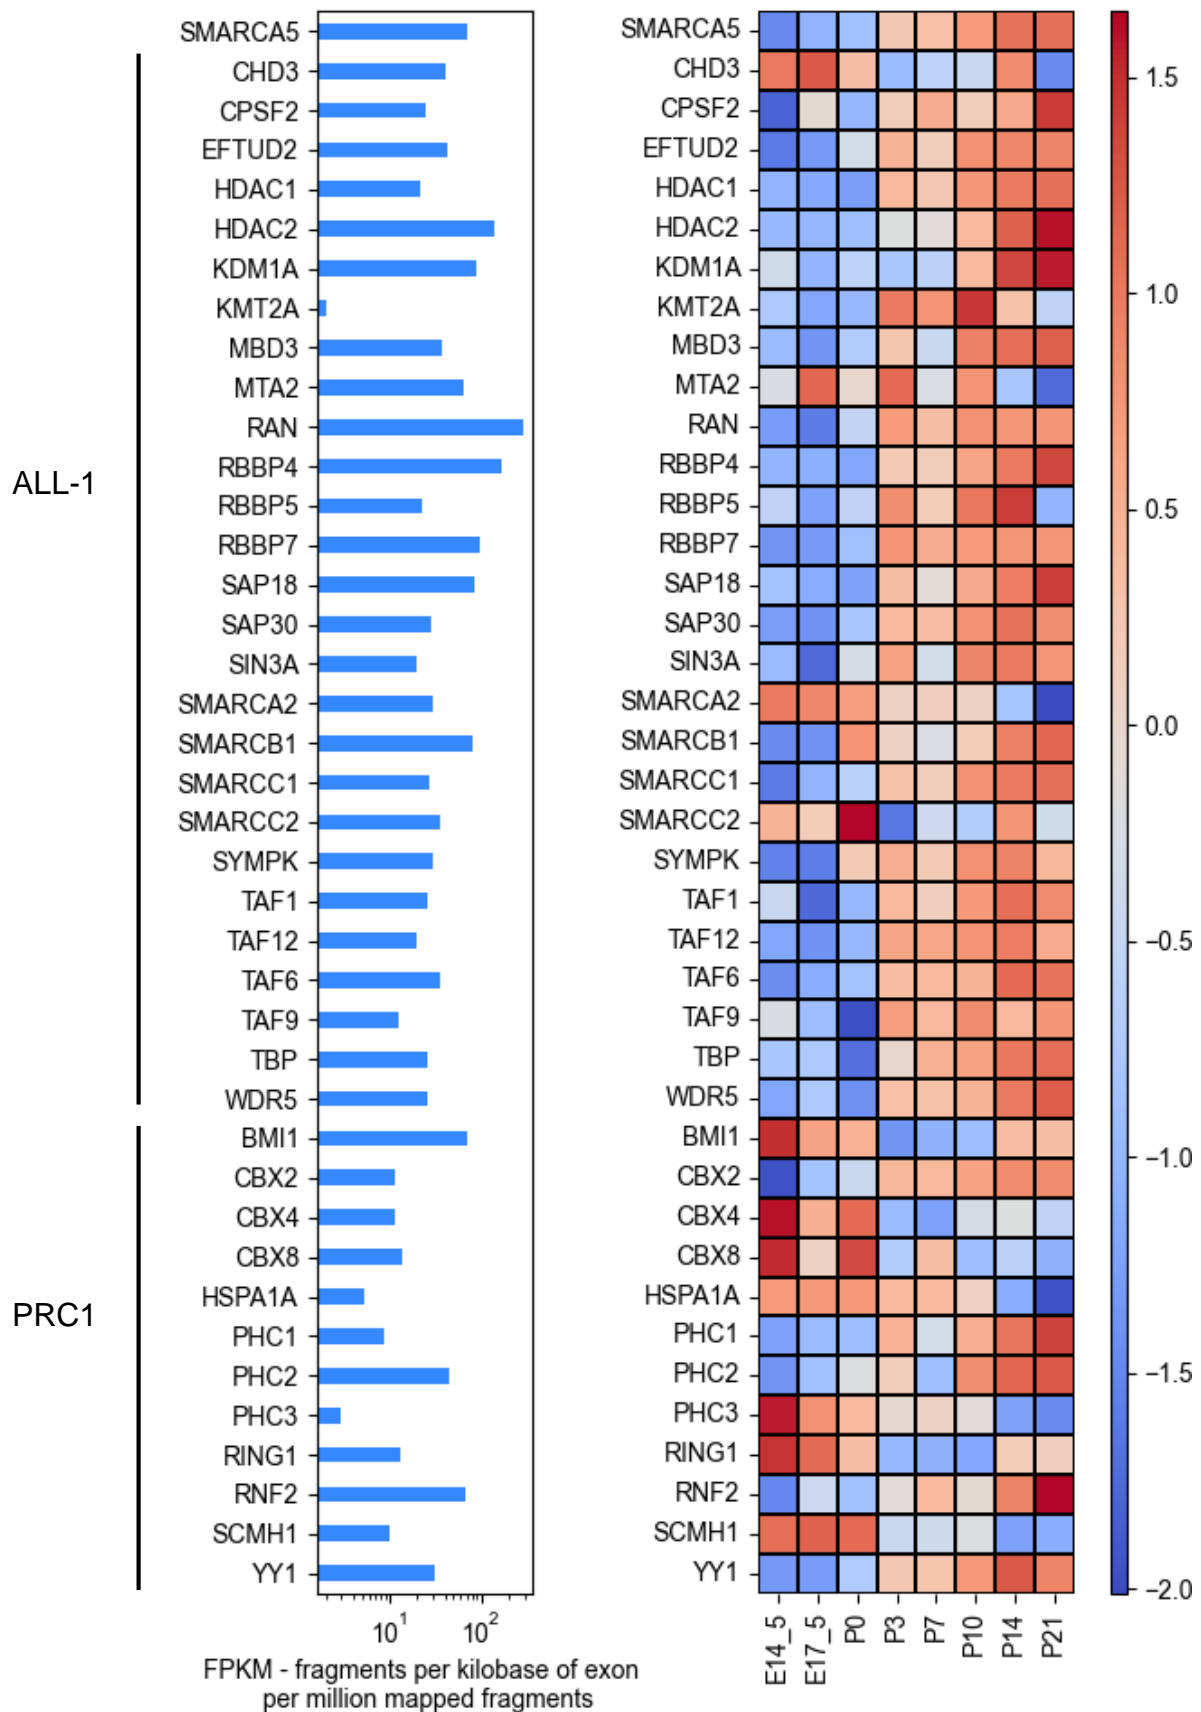

**Supplementary Figure S2. Expression of components of ALL-1 supercomplex and PRC1 complex during retinal development.**

Heatmap showing expression of components of ALL-1 supercomplex and PRC1 complex in retina at E14.5, E17.5, P0, P3, P7, P10, P14, and P21 (GSE87064 (Aldiri et al., 2017)). The left graph indicates FPKM.

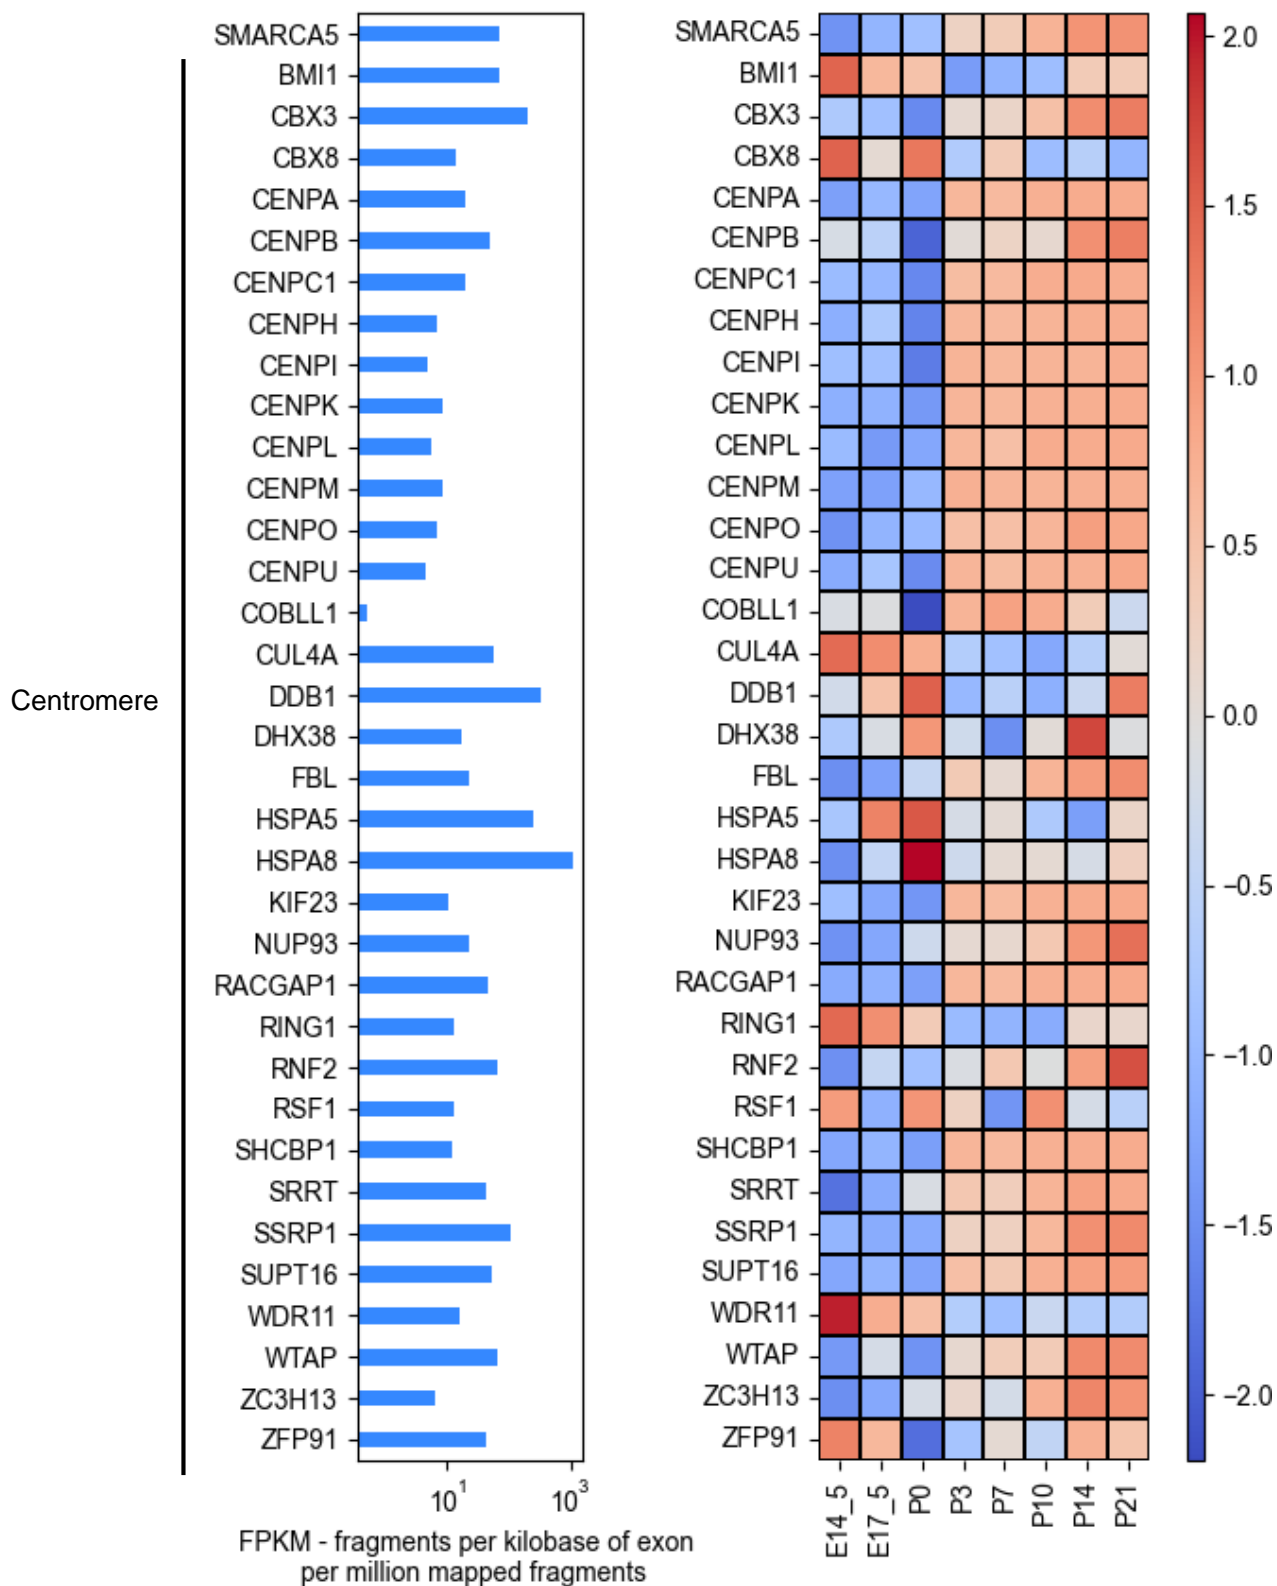

**Supplementary Figure S3. Expression of centromere complex components during retinal development.**

Heatmap showing expression of components of centromere complex in retina at E14.5, E17.5, P0, P3, P7, P10, P14, and P21 (GSE87064 (Aldiri et al., 2017)). The left graph indicates FPKM.

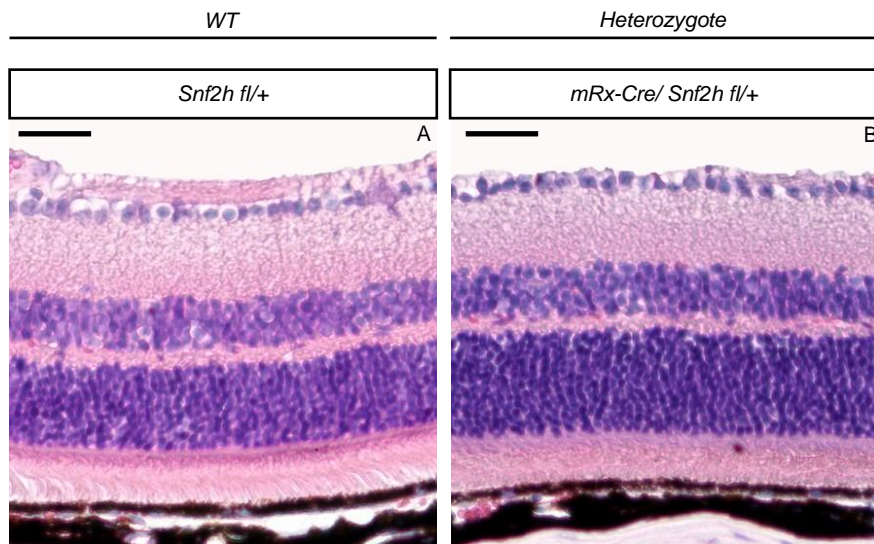

**Supplementary Figure S4. Morphology of heterozygous mice at postnatal week 50 (PW50).**

Hematoxylin and eosin staining of wild-type (A) and *mRx-Cre/ Snf2h*<sup>fl/+</sup> (B) mice did not manifest obvious differences between the two genotypes. One active allele of the *Snf2h* gene is thus sufficient for the maintenance of an apparently normal gross retinal morphology.

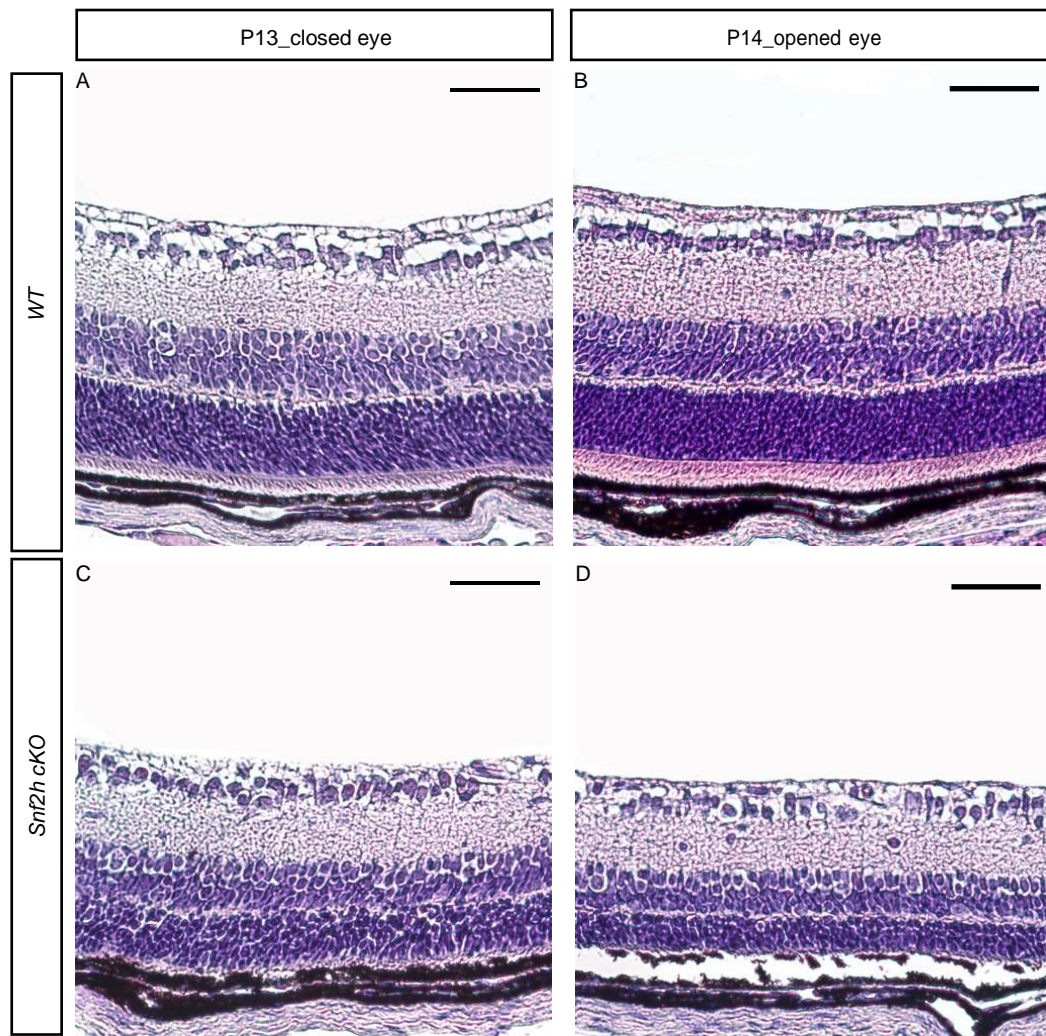

**Supplementary Figure S5. Retinal morphology of *Snf2h* cKO at P13 and P14.**

Hematoxylin-eosin staining of postnatal retinal sections at postnatal day 13 (P13) and day 14 (P14) of wild-type and *Snf2h* cKO. The retinal section of *Snf2h* cKO at P14 (D) was clearly thinner compared with the same genotype at P13 (C).



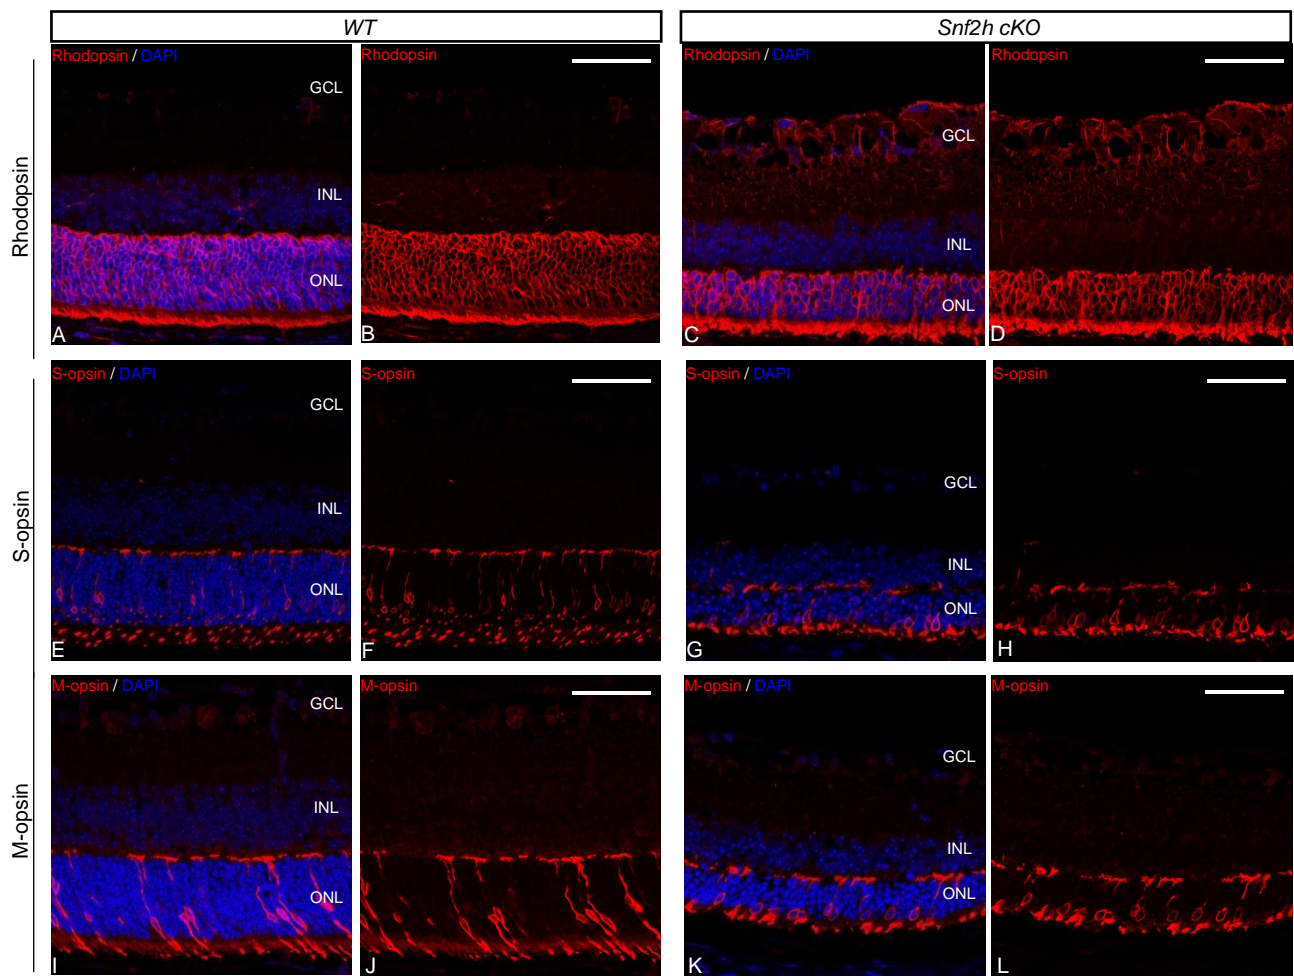

### Supplementary Figure S6. Photoreceptor characterization at P13 (before eye opening).

Rod photoreceptors in the wild-type retina (A, B). The rod photoreceptors in *Snf2h* cKO were present (C, D). Although the number of rods was reduced, their cell shape and positioning was comparable with the wild-type controls. The same result was obtained with cone photoreceptor staining (E-H, I-L).

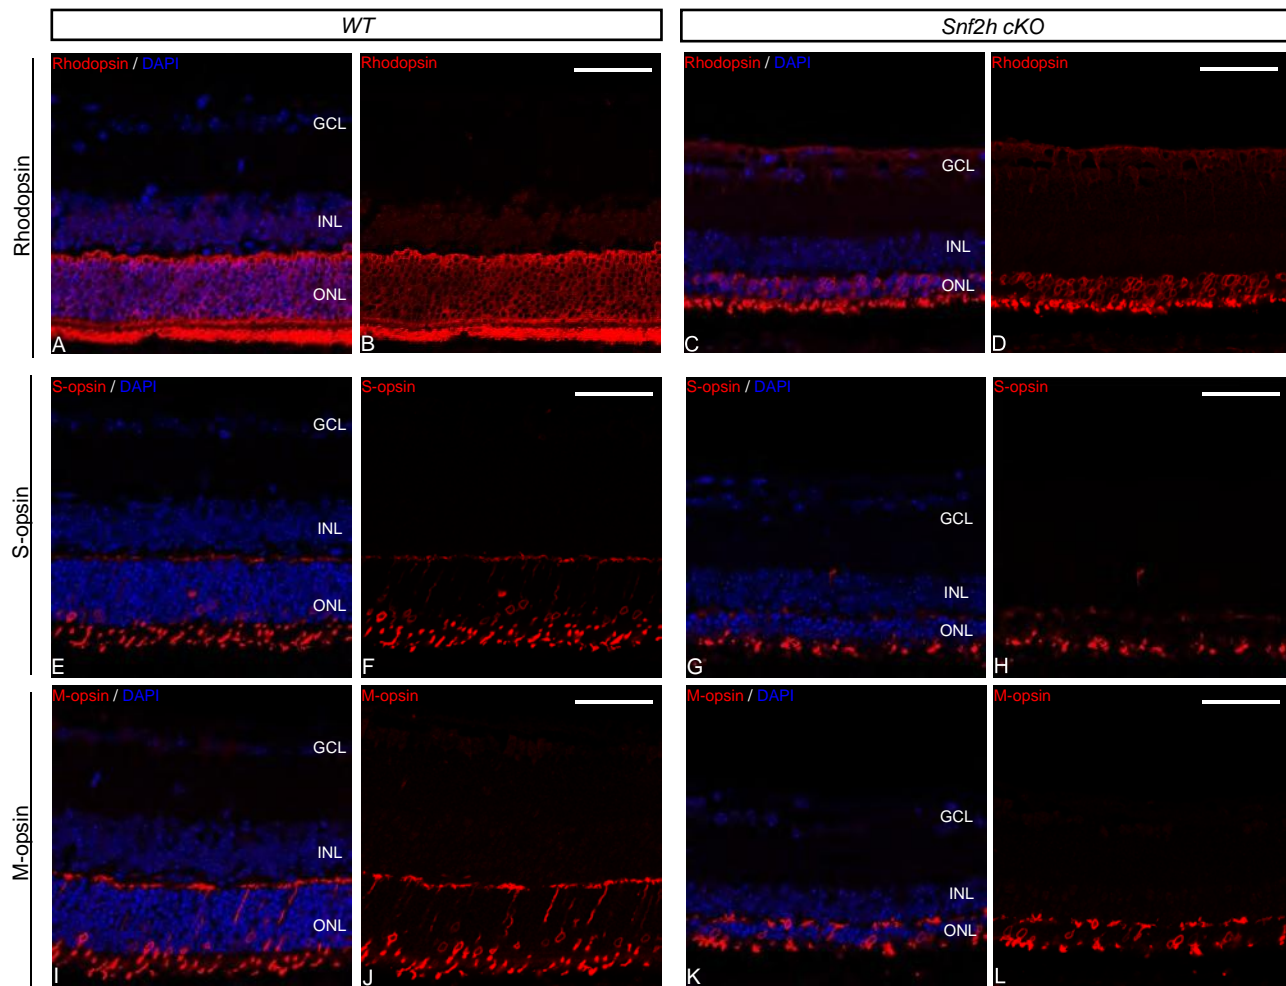

### Supplementary Figure S7. Photoreceptor characterization at P14 (after eye opening).

The rod photoreceptors in *Snf2h* cKO were preserved, but their length was reduced by about a half compared with control, which was associated with reduced thickness of the ONL in *Snf2h* cKO (A-D). The cone photoreceptors exhibited an abnormal shape, the outer segments were reduced, and the photoreceptor protrusions detected in wild-type animals inside the OPL were missing in *Snf2h* cKO (E-H, I-L).

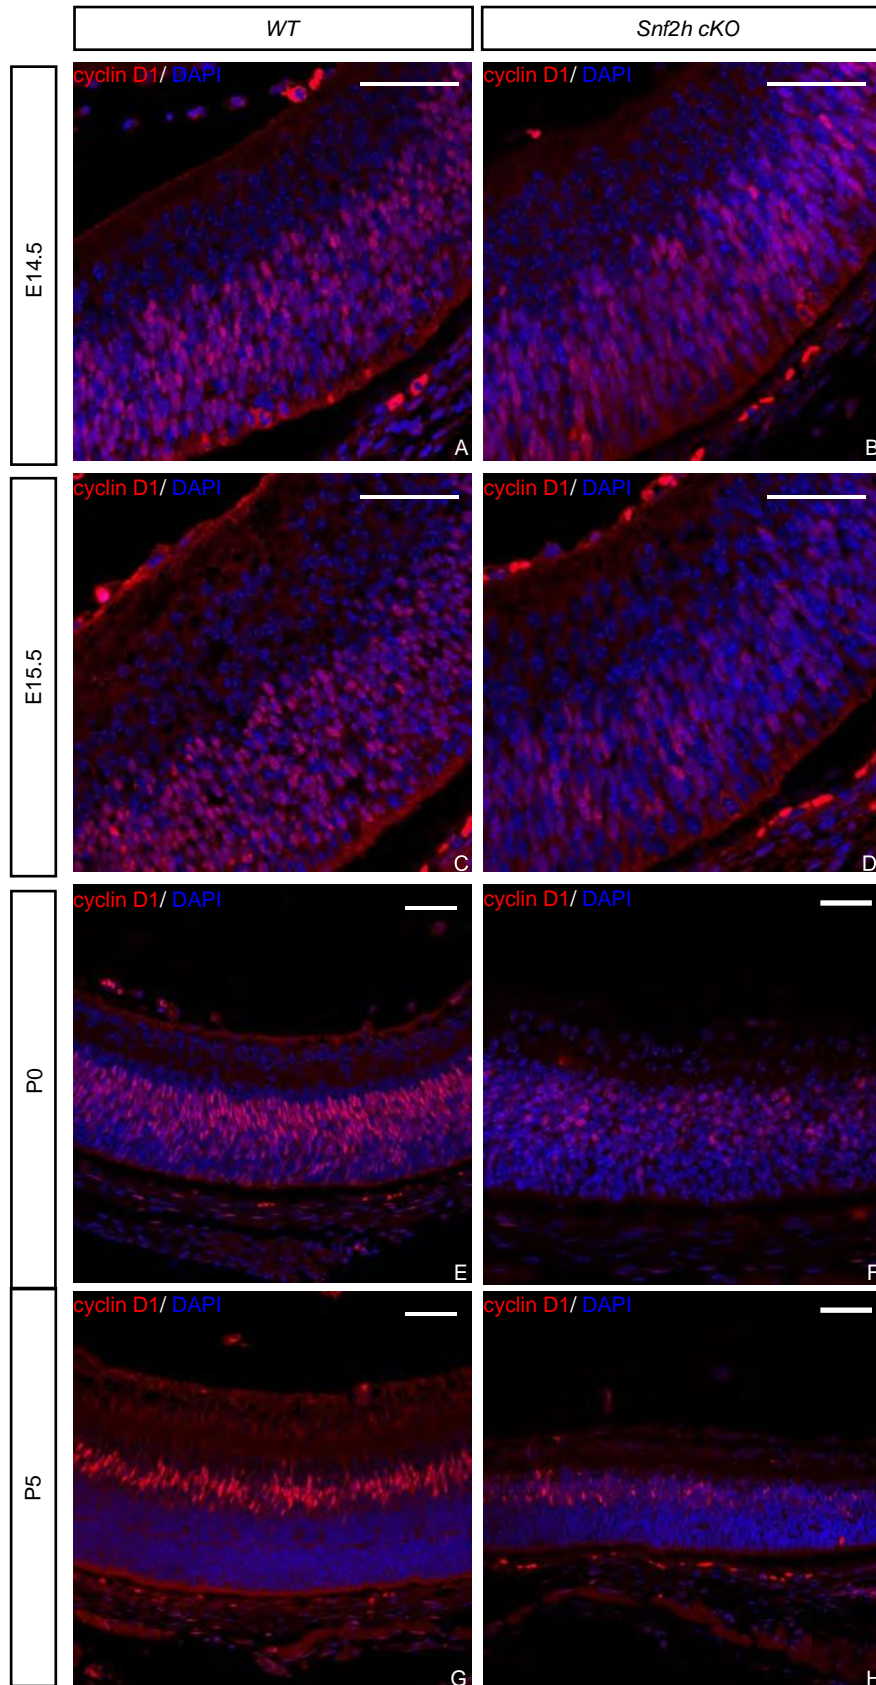

**Supplementary Figure S8. Expression of cyclin D1 in *Snf2h* cKO during embryonic and postnatal stages.**

Immunostaining for cyclin D1, required for G1/S transition during the cell cycle, in wild-type and *Snf2h* cKO. Differences in cyclin D1 immunoreactivity appeared already during embryonic development (A-D). A dramatic decrease in cyclin D1-positive cells and cyclin D1 expression level in *Snf2h* cKO compared with wild-type controls was observed at birth (E, F) and at P5 (G, H).



**Supplementary Table S1. List of primary antibodies used for immunohistochemistry**

| Antigen                         | Host   | Dilution | Retinal cell types       | stage  |
|---------------------------------|--------|----------|--------------------------|--------|
| Snf2h (Abcam)                   | Rabbit | 1:500    |                          | Adult  |
| Rhodopsin (Chemicon)            | Mouse  | 1:200    | Cone photoreceptor cells | Adult  |
| S-opsin (Santa Cruz)            | Goat   | 1:500    | Cone photoreceptor cells | Adult  |
| M-opsin (Santa Cruz)            | Rabbit | 1:500    | Cone photoreceptor cells | Adult  |
| Lhx2 (Santa Cruz)               | Goat   | 1:1000   | Müller glial cells       | Adult  |
| Chx10 (ThermoFisher Scientific) | Sheep  | 1:500    | Bipolar cells            | Adult  |
| Oc2 (R&D Systems)               | Sheep  | 1:500    | Horizontal cells         | Adult  |
| Pax6 (Covance)                  | Rabbit | 1:500    | Amacrine cells           | Adult  |
| Brn3a (Dr. E. Turner)           | Rabbit | 1:4000   | Retinal ganglion cells   | Adult  |
| Tbr2 (Abcam)                    | Rabbit | 1:500    | Retinal ganglion cells   | Adult  |
| Otx2 (Dr. Vaccarino)            | Rabbit | 1:500    | Photoreceptor cells      | Embryo |
| Crx (Santa Cruz)                | Rabbit | 1:100    | Photoreceptor cells      | Embryo |
| Blimp1 (Santa Cruz)             | Rat    | 1:300    | Photoreceptor cells      | Embryo |
| Rxry (Santa Cruz)               | Rabbit | 1:3000   | Photoreceptor cells      | Embryo |
| cCas3 (Cell Signaling)          | Rabbit | 1:500    |                          | Embryo |
| Cyclin D1 (Santa Cruz)          | Mouse  | 1:300    |                          | Embryo |
| pH3 (Santa Cruz)                | Rabbit | 1:800    |                          | Embryo |
| CENP-A (Cell Signaling)         | Rabbit | 1:500    |                          | Embryo |

**Supplementary Table S2. List of primers used for qRT-PCR**

| <b>Name</b> | <b>Sequence (5'→3')</b> |
|-------------|-------------------------|
| Atm-F       | CCAGGGGAAGATGATGAAGA    |
| Atm-R       | TCGGCAGCTAAAGGACTCAT    |
| Atr-F       | GCTGTAGCGTCCTTTCGTTC    |
| Atr-R       | GGCTCATGCATAGCAGCATA    |
| Casp3-F     | GAGATGGCTTGCCAGAAGAT    |
| Casp3-R     | CCGTCCTTTGAATTTCTCCA    |
| Casp9-F     | GATGCTGTCCCCTATCAGGA    |
| Casp9-R     | CAGAATGCCATCCAAGGTCT    |
| Cdkn2a-F    | GCTCTGGCTTTCGTGAACAT    |
| Cdkn2a-R    | CGAATCTGCACCGTAGTTGA    |
| CyclinA-F   | CTGTCTCTTTACCCGGAGCA    |
| CyclinA-R   | AACGTTCACTGGCTTGTCTTC   |
| CyclinB-F   | GAGAAGGTGCCTGTGTGTGA    |
| CyclinB-R   | GGCTTGGAGAGGGATTATCA    |
| CyclinE-F   | CGTTACATGGCATCACAACA    |
| CyclinE-R   | GGTGCAACTTTGGAGGGTAG    |
| CyclinG-F   | GGCTTTGACACGGAGACATT    |
| CyclinG-R   | AGTCGCTTTCACAGCCAAAT    |
| Mdm2-F      | TGTGTGAGCTGAGGGAGATG    |
| Mdm2-R      | ATCCTGATCCAGGCAATCAC    |
| p21-F       | GTA CTTCCTCTGCCCTGCTG   |
| p21-R       | TCTGCGCTTGGAGTGATAGA    |
| p48-F       | AACCAGGCCCAAGGTTAT      |
| p48-R       | CCTCTGGGGTCCACACTTTA    |
| p53-F       | CTAGCATT CAGGCCCTCATC   |
| p53-R       | ACTCCTCCATGGCAGTCATC    |
| Gadd45b-F   | CACCCTGATCCAGTCGTTCT    |
| Gadd45b-R   | TTGGCTTTTCCAGGAATCTG    |
| Sfn-F       | TGGCCCTGAACTTTTCAGTC    |
| Sfn-R       | GATGAGGGTGCTGTCCTTGT    |
| UBB-F       | ATGTGAAGGCCAAGATCCAG    |
| UBB-R       | TAATAGCCACCCCTCAGACG    |
| Actb-F      | GTCCACACCCGCCACCAAGTTC  |
| Actb-R      | TTCTCCATGTCGTCCCAGTTG   |
| Ubb-F       | ATGTGAAGGCCAAGATCCAG    |
| Ubb-R       | TAATAGCCACCCCTCAGACG    |
| Sdha-F      | AAGGCAAATGCTGGAGAAGA    |
| Sdha-R      | TGGTTCTGCATCGACTTCTG    |
| Gapdh-F     | AACTTTGGCATTGTGGAAGG    |
| Gapdh-R     | ATCCACAGTCTTCTGGGTGG    |
